# Supplementary material for: Human milk metals and metalloids shape infant microbiota
Source: Royal Society of Chemistry journal article supplement (doi:10.1039/d4fo01929f), 2024-01-01
Supplement: d4fo01929f1.pdf [file d4fo01929f1.pdf]

## Electronic Supplementary Information

### Human Milk Metals and Metalloids Shape Infant Microbiota

Eduard Flores Ventura,<sup>\*a</sup> Manuel Bernabeu,<sup>a</sup> Belén Callejón-Leblic,<sup>b</sup> Raúl Cabrera-Rubio,<sup>a</sup> Laxmi Yeruva,<sup>c</sup> Javier Estañ-Capell,<sup>d</sup> Cecilia Martínez-Costa,<sup>d</sup> Tamara García-Barrera,<sup>b</sup> and María Carmen Collado<sup>\*a</sup>

<sup>a</sup> Institute of Agrochemistry and Food Technology- Spanish National Research Council (IATA-CSIC), Valencia, Spain

<sup>b</sup> Research Centre of Natural Resources, Health and the Environment (RENSMA), Department of Chemistry, Faculty of Experimental Sciences, University of Huelva, Campus El Carmen, Fuerzas Armadas Ave., 21007, Huelva, Spain

<sup>c</sup> Microbiome and Metabolism Research Unit, USDA-ARS, SEA, Little Rock, AR, USA; Arkansas Children's Nutrition Center, Little Rock, AR, USA.

<sup>d</sup> Department of Pediatrics, University of Valencia, INCLIVA Biomedical Research Institute, Avenida Blasco Ibáñez 15-17, 46010 Valencia, Spain

\* Corresponding author: MCC, Institute of Agrochemistry and Food Technology (IATA-CSIC), Department of Biotechnology, Unit of Lactic Acid Bacteria and Probiotics, Av. Agustín Escardino 7, 46980 Paterna, Valencia, Spain; Phone +34 96900022; e-mail: [mcolam@iata.csic.es](mailto:mcolam@iata.csic.es)

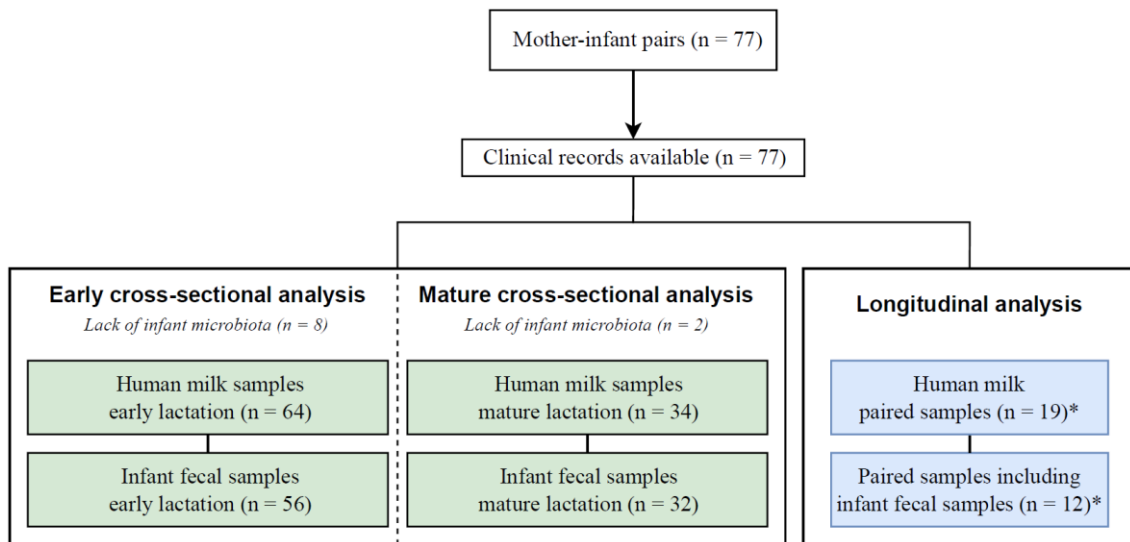

**Fig. S1.** Flow diagram of mother-infant pairs inclusion.

\*Mother infant samples available at two different times points: the early lactation stage (between 7 and 15 days postpartum) and the mature lactation stage (between 30 and 60 days postpartum). 71 human milk samples were analysed for lead (Pb), aluminium (Al), arsenic (As), and cadmium (Cd).

**Table S1.** Cohort characteristics

|                                                     | Total population (N=77#) |
|-----------------------------------------------------|--------------------------|
| <b>Maternal characteristics</b>                     |                          |
| Gestational age (weeks)*                            | 40 (39-41)               |
| Pregestational BMI (kg/m <sup>2</sup> )*^           | 22.55 (20.48-24.75)      |
| Weight gain over pregnancy (Kg)*^                   | 12 (10-15)               |
| Antibiotic during pregnancy^ (n <sup>o</sup> cases) |                          |
| Yes                                                 | 21                       |
| No                                                  | 55                       |
| Not available                                       | 1                        |
| Antibiotics during labour (n <sup>o</sup> cases)    |                          |
| Yes                                                 | 33                       |
| No                                                  | 44                       |
| Delivery mode (n)                                   |                          |
| C-section                                           | 31                       |
| Vaginal                                             | 46                       |
| <b>Infant characteristics</b>                       |                          |
| Gender (n)                                          |                          |
| Females                                             | 45                       |
| Males                                               | 32                       |
| Breastfeeding duration (months)*                    | 6 (4.5-6)                |
| Weight at birth (kg)*                               | 3.28 (3-3.55)            |
| Weight at 7 days (kg)*                              | 3.29 (2.98-3.59)         |
| Weight at 15 days (kg)*                             | 3.5 (3.18-3.78)          |
| Weight at 1 month (kg)*                             | 4.05 (3.73-4.54)         |
| BMI z-score at birth                                | -0.11(-0.62-0.6)         |

#For some data, n=76 was provided as missing data from infant was missing.  
\*Values expressed as Median (Quartile 1 - Quartile 3).  
^Variable with missing data in 1 mother.

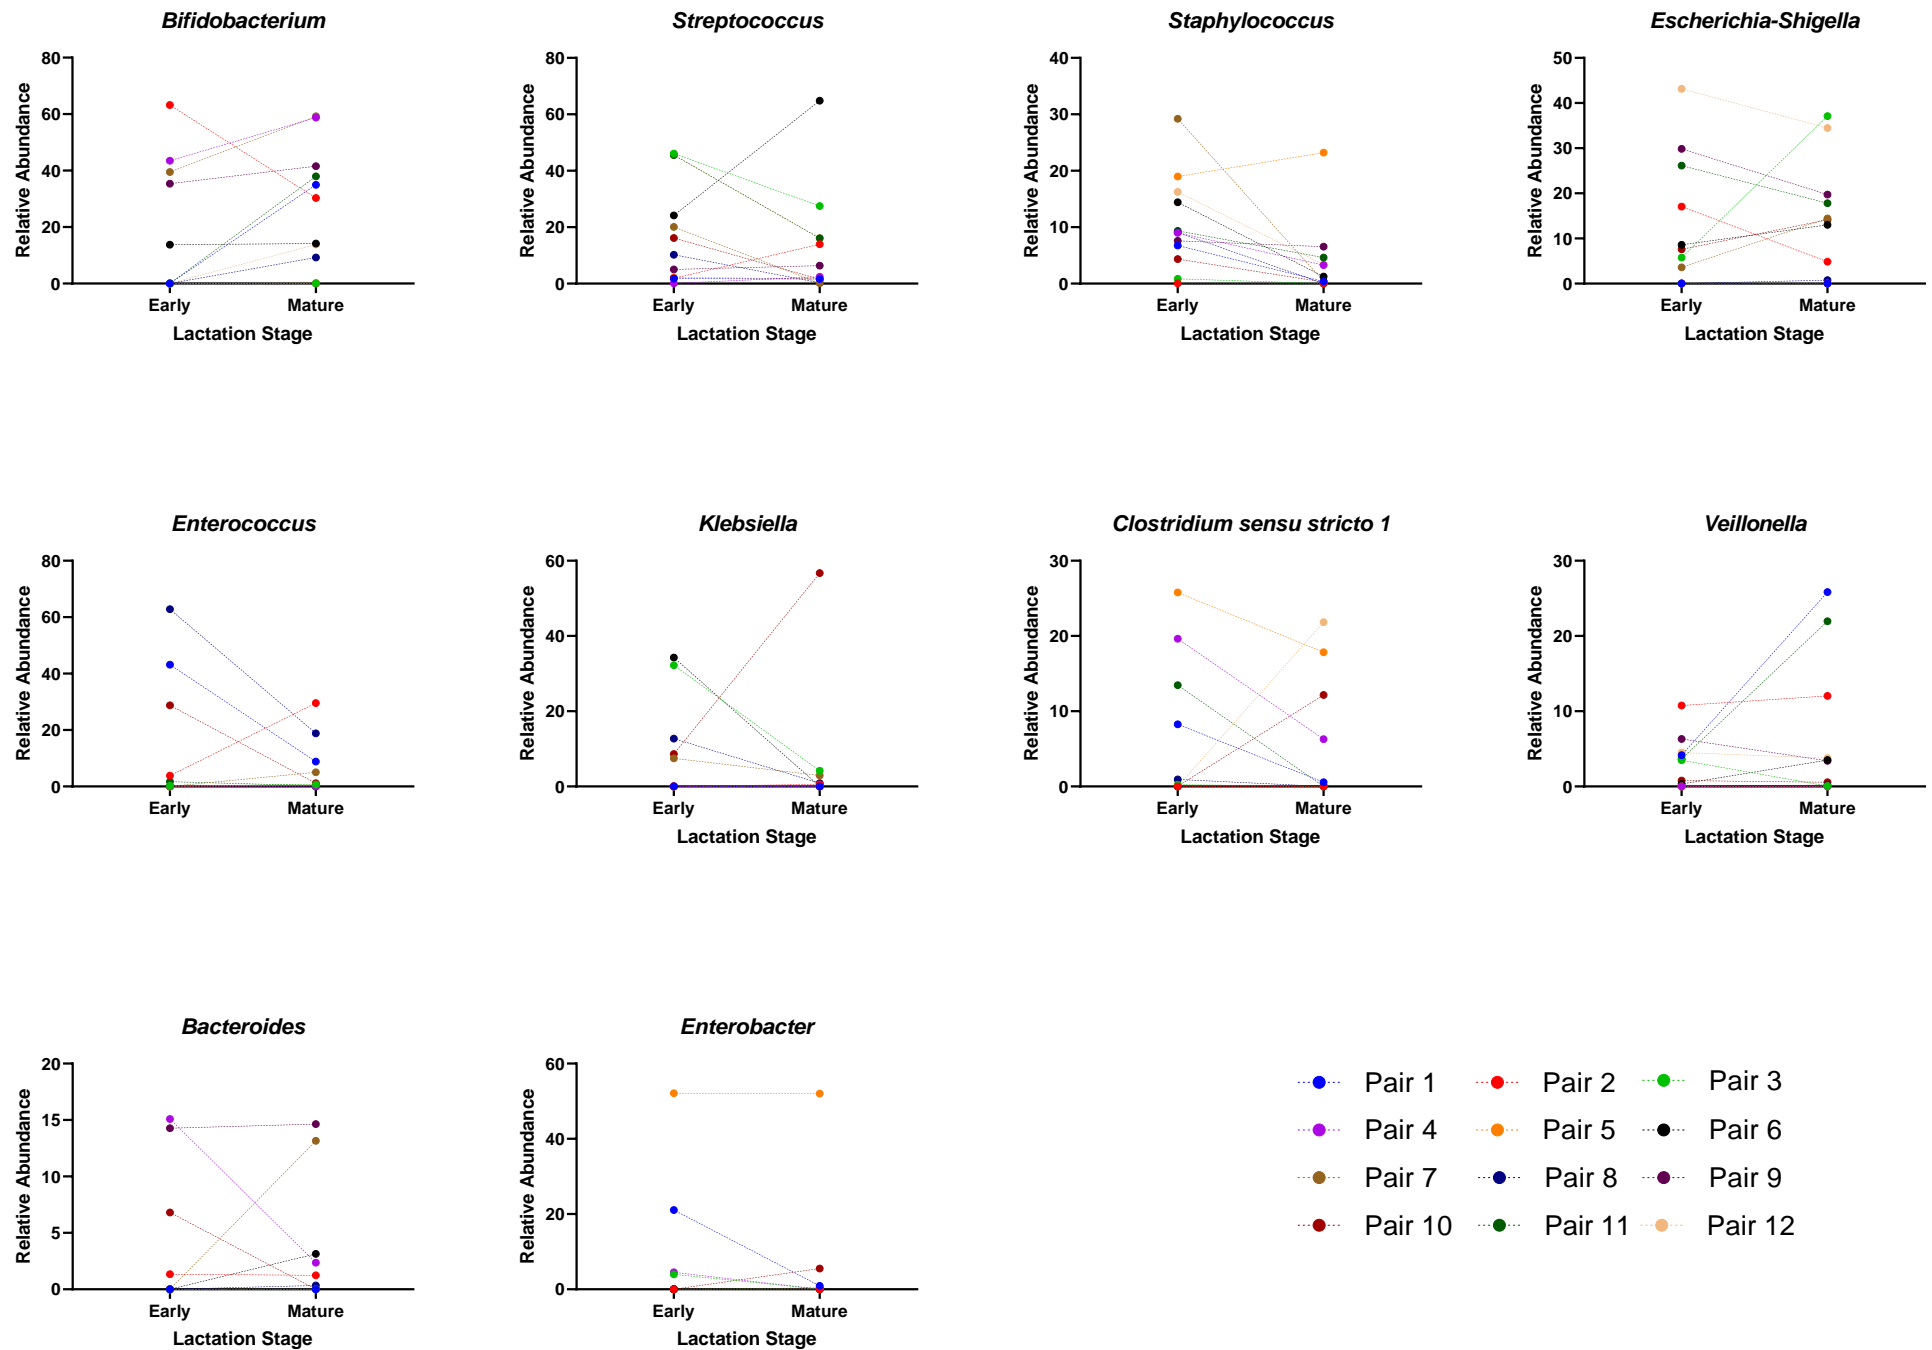

**Fig. S2.** Longitudinal trends in bacterial abundance at the genus level in infant faeces from the 7th day to the 2nd month postpartum. Figure developed using GraphPad Prism 8 software.

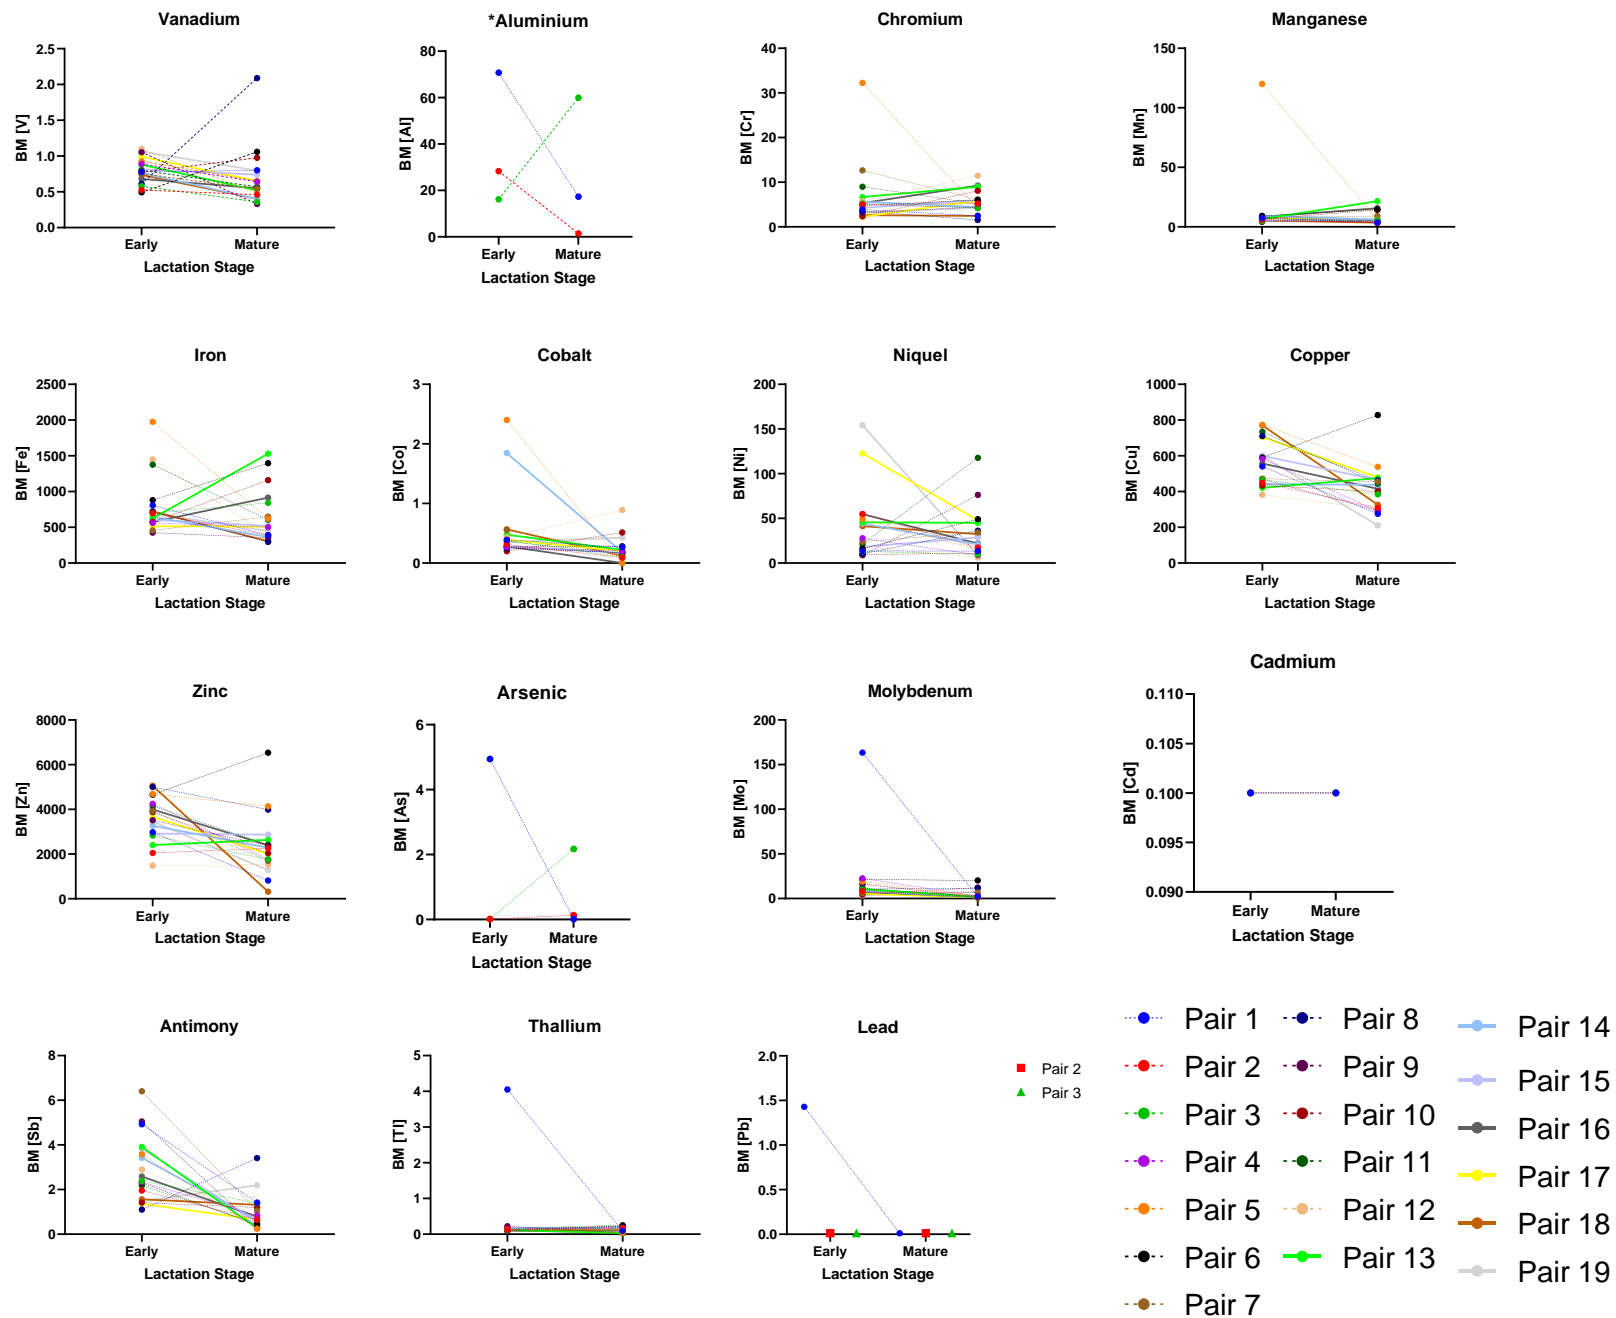

**Fig. S3.** Longitudinal trends in metal and metalloid concentrations at the ng g<sup>-1</sup> or ng ml<sup>-1</sup> level in human milk samples from the 7th day to the 2nd month postpartum. Figure developed using GraphPad Prism 8 software. Out of 98 human milk samples, 71 were analysed for lead (Pb), aluminium (Al), arsenic (As), and cadmium (Cd), with 3 longitudinal pairs available. The limits of detection (LODs) for each element were as follows: Pb (0.01), Al (1.41), As (0.01), and Cd (0.1). When concentrations were below the LOD, they were reported accordingly.

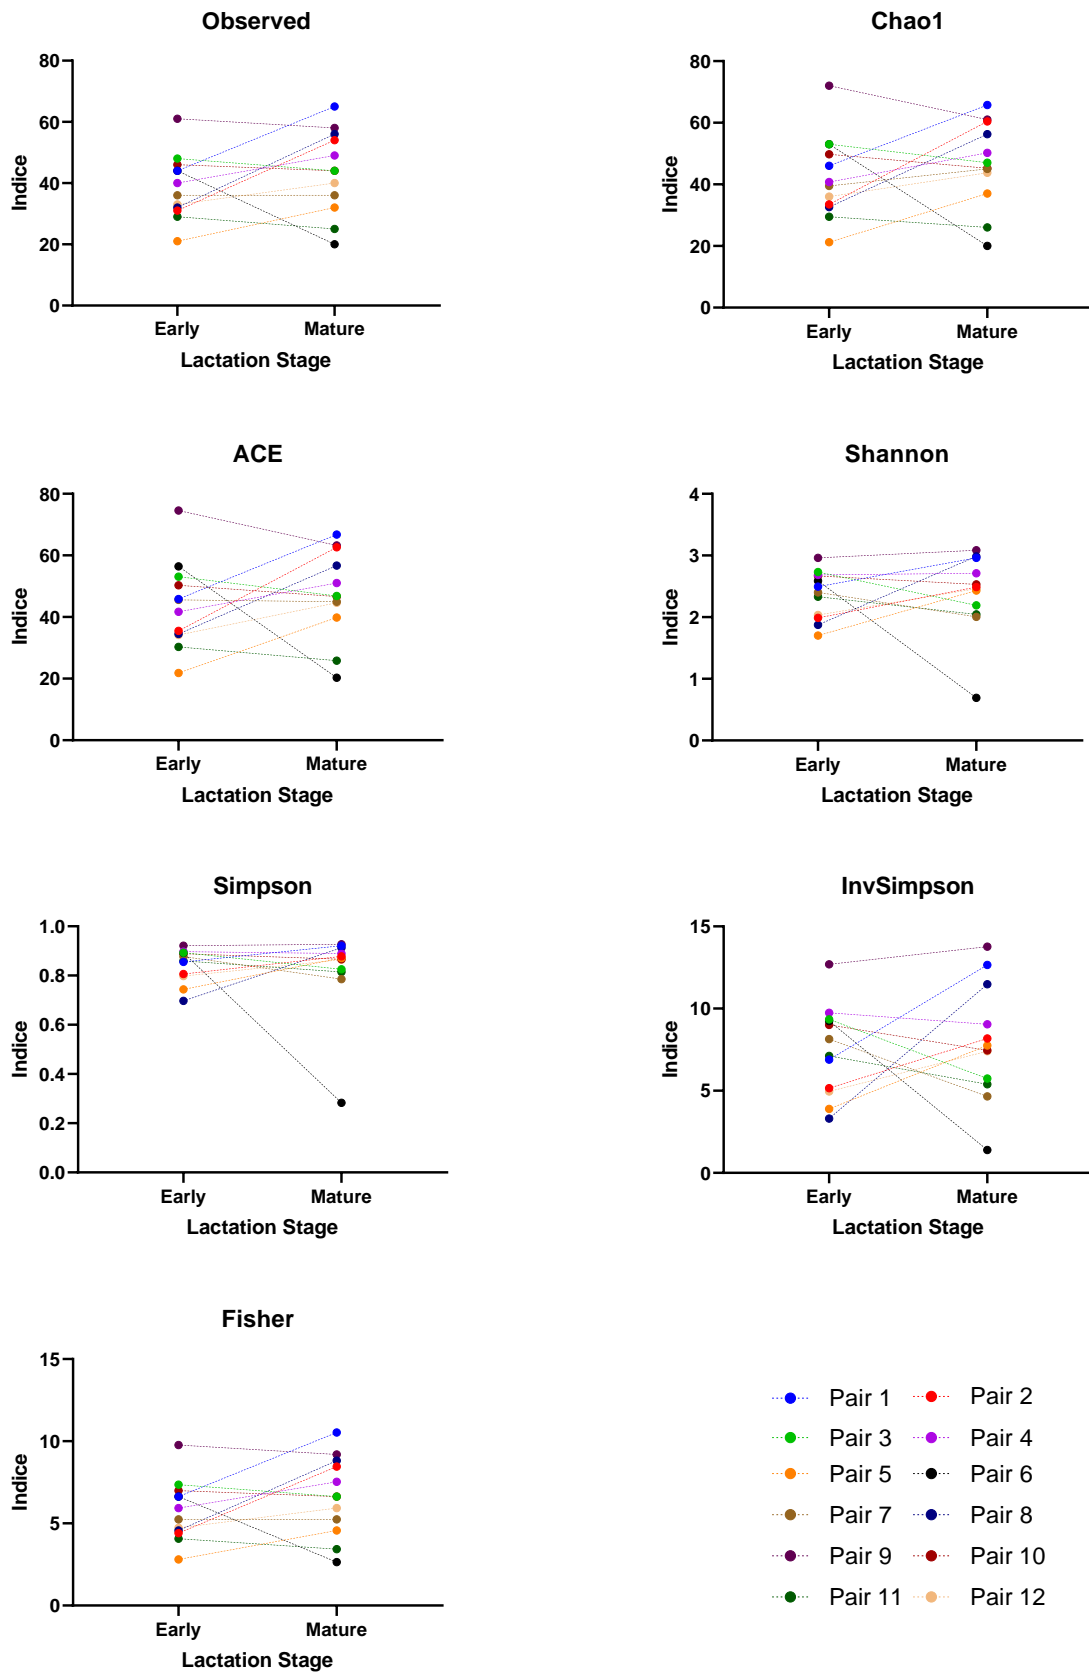

**Fig. S4.** Longitudinal trends in alpha diversity indices in infant faecal samples from the 7th day to the 2nd month postpartum. Figure developed using GraphPad Prism 8 software.

**Table S2.** Infant gut microbiota alpha-diversity indices

|                   | Early lactation stage (n = 56) | Mature lactation stage (n =32) | p-values* |
|-------------------|--------------------------------|--------------------------------|-----------|
| <b>Observed</b>   | 33.5 (27.8-44)                 | 42 (30.5-54.5)                 | 0.036     |
| <b>Chao1</b>      | 37.63 (30.38-49.15)            | 45.1 (35.83-61)                | 0.057     |
| <b>ACE</b>        | 41.33 (32.03-50.33)            | 45.81 (35.96-62.22)            | 0.06      |
| <b>Shannon</b>    | 2.17 (1.87-2.45)               | 2.19 (1.88-2.53)               | 0.65      |
| <b>Simpson</b>    | 0.82 (0.75-0.86)               | 0.83 (0.77-0.88)               | 0.66      |
| <b>InvSimpson</b> | 5.67 (4.01-7.51)               | 5.86 (4.27-8.26)               | 0.64      |
| <b>Fisher</b>     | 4.82 (4.03-6.64)               | 6.28 (4.32-8.54)               | 0.042     |

Median (Quartile 1-Quartile 3) of alpha diversity indices calculated for 88 infant stool samples. \*p-values under 0.05, show significant differences between unpaired early and mature samples as determined by a Mann-Whitney U test.

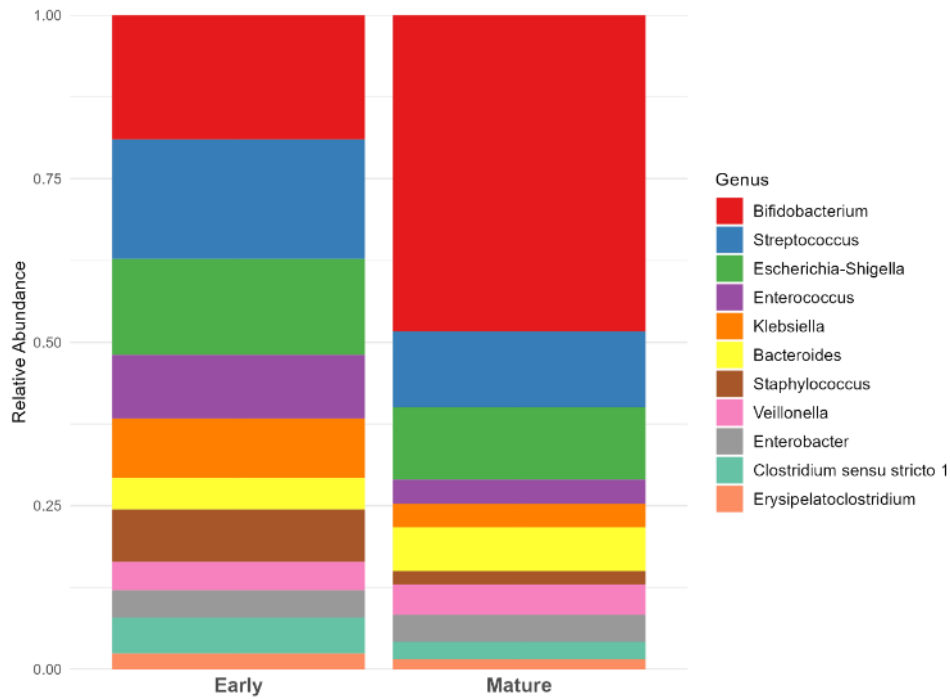

**Fig. S5.** Infant gut microbiota at genus level. Data is shown as relative abundances.

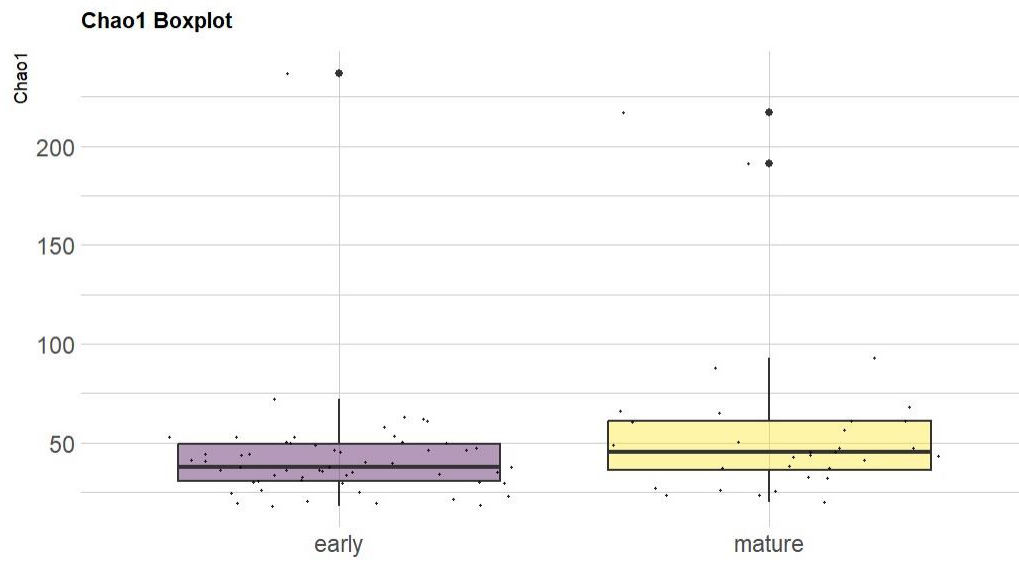

**Fig.S6.** Boxplot showing differences between Chao1 indices during early and mature lactation stage in infant faecal microbiota.

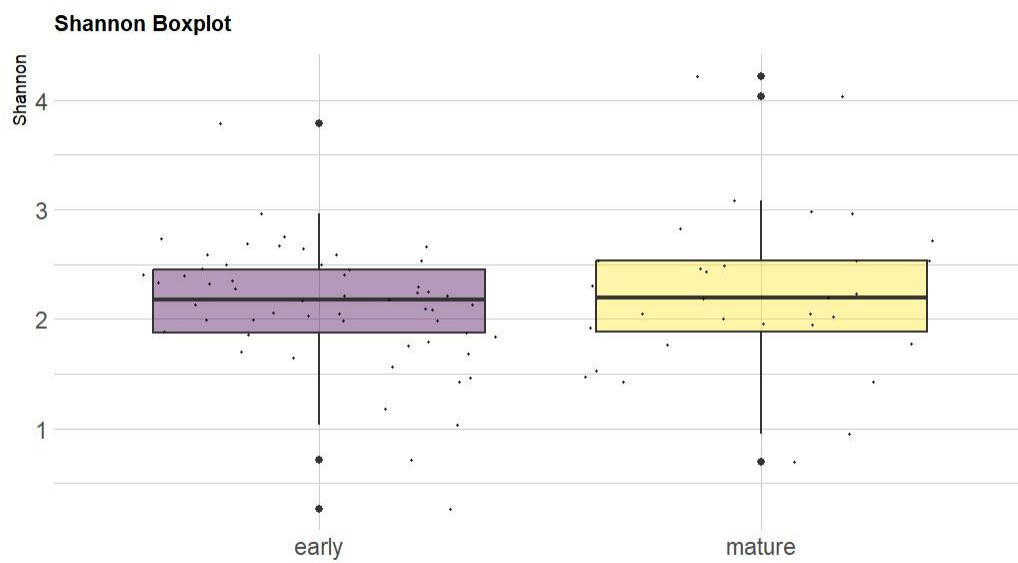

**Fig. S7.** Boxplot showing differences between Shannon indices during early and mature lactation stage in infant faecal microbiota.

**Table S3.** Correlations between infant gut microbiota and alpha-diversity indices and Pb, Al and As

|                               | *                                  | Pb<br>(n = 11) | Al<br>(n = 59) | As<br>(n = 32) |          |
|-------------------------------|------------------------------------|----------------|----------------|----------------|----------|
| Infant gut microbiota         | <i>Bifidobacterium</i>             | rho            | -0.32722       | -0.08823       | -0.16843 |
|                               |                                    | p-values       | 0.3561         | 0.551          | 0.382439 |
|                               | <i>Streptococcus</i>               | rho            | 0.030488       | -0.06568       | -0.04631 |
|                               |                                    | p-values       | 0.9334         | 0.6574         | 0.811233 |
|                               | <i>Staphylococcus</i>              | rho            | 0.347567       | 0.043969       | 0.347783 |
|                               |                                    | p-values       | 0.3251         | 0.7667         | 0.065129 |
|                               | <i>Escherichia-Shigella</i>        | rho            | 0.05033        | 0.098837       | -0.0376  |
|                               |                                    | p-values       | 0.8902         | 0.5039         | 0.8465   |
|                               | <i>Enterococcus</i>                | rho            | 0.204467       | -0.05303       | -0.06481 |
|                               |                                    | p-values       | 0.571          | 0.7204         | 0.7384   |
|                               | <i>Gemella</i>                     | rho            | 0.352313       | 0.15081        | 0.197038 |
|                               |                                    | p-values       | 0.3181         | 0.3062         | 0.3056   |
|                               | <i>Klebsiella</i>                  | rho            | -0.51853       | 0.1822         | 0.006535 |
|                               |                                    | p-values       | 0.1246         | 0.2152         | 0.9732   |
|                               | <i>Lactocaseibacillus</i>          | rho            | NA             | -0.00673       | 0.003363 |
|                               |                                    | p-values       | NA             | 0.9638         | 0.9862   |
|                               | <i>Clostridium sensu stricto 1</i> | rho            | -0.12963       | 0.019403       | -0.17902 |
|                               |                                    | p-values       | 0.7211         | 0.8959         | 0.3528   |
|                               | <i>Veillonella</i>                 | rho            | 0.154137       | 0.07621        | -0.2223  |
|                               |                                    | p-values       | 0.6707         | 0.6067         | 0.2464   |
|                               | <i>Bacteroides</i>                 | rho            | -0.02251       | -0.07989       | -0.23477 |
|                               |                                    | p-values       | 0.9508         | 0.5893         | 0.2202   |
|                               | <i>Enterobacter</i>                | rho            | 0.288525       | -0.02647       | -0.11875 |
|                               |                                    | p-values       | 0.4188         | 0.8582         | 0.5395   |
|                               | <i>Acinetobacter</i>               | rho            | NA             | 0.7257         | 0.039597 |
|                               |                                    | p-values       | NA             | 0.051975       | 0.8384   |
|                               | <i>Ruminococcus_gnavus_group</i>   | rho            | -0.07502       | -0.0545        | -0.28059 |
|                               |                                    | p-values       | 0.8368         | 0.7129         | 0.1404   |
| <i>Erysipelatoclostridium</i> | rho                                | -0.22628       | -0.13595       | 0              |          |
|                               | p-values                           | 0.5296         | 0.3569         | 1              |          |
| <i>Sediminibacterium</i>      | rho                                | NA             | NA             | NA             |          |
|                               | p-values                           | NA             | NA             | NA             |          |
| Diversity indices             | Shannon                            | rho            | -0.63416       | 0.071219       | -0.06207 |
|                               |                                    | p-values       | 0.04894        | 0.6305         | 0.7485   |
|                               | Chao1                              | rho            | 0.134969       | -0.08575       | 0.022677 |
|                               |                                    | p-values       | 0.7101         | 0.5623         | 0.907    |
|                               | Fisher                             | rho            | -0.01829       | -0.08686       | 0.016778 |
|                               |                                    | p-values       | 0.96           | 0.5572         | 0.9312   |
|                               | ACE                                | rho            | -0.01829       | -0.13082       | 0.065517 |
|                               |                                    | p-values       | 0.96           | 0.3755         | 0.7349   |
|                               | Simpson                            | rho            | -0.7744        | 0.046032       | -0.0468  |
|                               |                                    | p-values       | 0.008543       | 0.756          | 0.8093   |
|                               | InvSimpson                         | rho            | -0.72562       | 0.055477       | -0.01724 |
|                               |                                    | p-values       | 0.01753        | 0.708          | 0.9298   |

\*Rho and p-values represent the outputs of Spearman correlations. The available sample sizes for Pb, Al, and As were 11, 59, and 32, respectively. All metal concentrations correspond to early lactation stage, between 7<sup>th</sup> and 15<sup>th</sup> day post-partum. NA: not available, correlation and p-values were not computable.



**Table S4.** Comparison of Metal and Metalloid Concentrations with Literature Values.

| Study                                       | Year | samples | Location               | As                                                                                                 | Al                                                | Cd                      | Pb                                                                                       | Zn                          | Mn               | Cu                               | Fe                                                                                                                                                                                                          | Ni                 |
|---------------------------------------------|------|---------|------------------------|----------------------------------------------------------------------------------------------------|---------------------------------------------------|-------------------------|------------------------------------------------------------------------------------------|-----------------------------|------------------|----------------------------------|-------------------------------------------------------------------------------------------------------------------------------------------------------------------------------------------------------------|--------------------|
| <b>MAMI cohort</b>                          | 2024 | 98*     | Valencia, Spain        | 0.92-12.52                                                                                         | 13.5-67.18                                        | 0.3                     | 0.285-0.35                                                                               | 1520.7-4172.65              | 4.91-8.79        | 302.52-651.75                    | 391.6-1031.73                                                                                                                                                                                               | 13.68-47.23        |
| <b>Hasballah and Beheary (1)</b>            | 2016 | 10      | Damietta, Egypt        | NA                                                                                                 | NA                                                | 1.504±1.371             | 1.675±2.426                                                                              | 2.311±5.36                  | 0.254±0.42       | 0.076±0.15                       | 2.655±4.16                                                                                                                                                                                                  | 0.014±0.04         |
| <b>Dillon et al (2)</b>                     | 1974 | 29      | 7 US cities            | NA                                                                                                 | NA                                                | NA                      | 0.006-0.058                                                                              | NA                          | NA               | NA                               | NA                                                                                                                                                                                                          | NA                 |
| <b>Lamm et al (3)</b>                       | 1971 | 14      | Connecticut, US        | NA                                                                                                 | NA                                                | NA                      | 0.0-0.07                                                                                 | NA                          | NA               | NA                               | NA                                                                                                                                                                                                          | NA                 |
| <b>Souad et al (4)</b>                      | 2006 | 396     | Marrakech, Morocco     | NA                                                                                                 | 36.3 (3.1–117.4)                                  | NA                      | 36.3 ± 26.1                                                                              | NA                          | NA               | NA                               | NA                                                                                                                                                                                                          | NA                 |
| <b>Al-Saleh et al (5)</b>                   | 2003 | 171     | Riyadh, Saudi Arabia   | NA                                                                                                 | NA                                                | 1.011 (<LOD-11.672)     | 16.397 (<DL-354.901)                                                                     | NA                          | NA               | NA                               | NA                                                                                                                                                                                                          | NA                 |
| <b>Al-Saleh et al (5)</b>                   | 2003 | 201     | Al-Ehssa, Saudi Arabia | NA                                                                                                 | NA                                                | 1.483 (<LOD-9.224)      | 26.889 (<LOD-489.832)                                                                    | NA                          | NA               | NA                               | NA                                                                                                                                                                                                          | NA                 |
| <b>Turan et al (6)</b>                      | 2001 | 30      | Ankara, Turkey         | NA                                                                                                 | NA                                                | 2.8 (1.2-9)             | 14.6 (8.8-35.4)                                                                          | 12900 (4500-27100)          | 43.2 (12.5-70.7) | 278 (179-454)                    | 3500 (2100-11000)                                                                                                                                                                                           | 27.8 (14.9-47.9)   |
| <b>Leotsinidis et al (7)</b>                | 2005 | 95      | Patras, Greece         | NA                                                                                                 | NA                                                | 0.127 (<LOD-0.487)      | <LOD (0.94)                                                                              | 2969 (864-6550)             | 2.56 (0.17-9.89) | 408 (120-614)                    | 369 (96-1544)                                                                                                                                                                                               | NA                 |
| <b>Namihira et al (8)</b>                   | 1986 | 35      | Mexico City, Mexico    | NA                                                                                                 | NA                                                | NA                      | 61.6                                                                                     | NA                          | NA               | NA                               | NA                                                                                                                                                                                                          | NA                 |
| <b>Toxicological guidance value: (9,10)</b> |      |         |                        | BMDL0.5: 3.0 µg/kg bw per day (2.0-7.0 µg/kg bw per day (for inorganic arsenic), NOAEL of 30 mg/kg | 2 mg/kg bw (expressed as Al), 30 mg/kg bw per day | PTMI 25 µg/kg bw (2010) | Children: 0.03 to 9 µg/kg bw/d (mean), 0.2 to 8.2 µg/kg bw/d (90th to 97.5th percentile) | PMTDI 0.3-1 mg/kg bw (1982) | NA               | PMTDI 0.05 - 0.5 mg/kg bw (1982) | PMTDI 0.8 mg/kg bw (iron from all sources except for iron oxides used as colouring agent, supplemental iron taken during pregnancy and lactation, and supplemental iron for specific clinical requirements) | TDI of 13 µg/kg bw |

All concentrations are in ng/ml. 71 human milk samples analysed for Pb, Al, As, and Cd. Values shown are medians and standard deviations. NA; not available, Benchmark Dose Lower Confidence Limit, BMDL0; No Observed Adverse Effect Level, NOAEL; Provisional Tolerable Monthly Intake, PTMI; tolerable daily intake, TDI. See references below.

#### List of references table S4:

1. Hasballah AF, Beheary MS. Detection of Heavy Metals in Breast Milk and Drinking Water in Damietta Governorate, Egypt. *Asian Journal of Biology* 2016;1–7.
2. Dillon HK, Wilson DJ, Schaffner W. Lead concentrations in human milk. *Am J Dis Child* 1974;128:491–2.
3. Lamm S, Cole B, Glynn K, Ullmann W. Lead Content of Milks Fed to Infants — 1971–1972. *New England Journal of Medicine Massachusetts Medical Society*; 1973;289:574–5.
4. Souad C, Farida Z, Nadra L, François B, Bougle D, Azeddine S. Trace element level in infant hair and diet, and in the local environment of the Moroccan city of Marrakech. *Science of The Total Environment* 2006;370:337–42.
5. Al-Saleh I, Shinwari N, Mashhour A. Heavy metal concentrations in the breast milk of Saudi women. *Biol Trace Elem Res* 2003;96:21–37.
6. Turan S, Saygi Ş, Kiliç Z, Acar O. Determination of Heavy Metal Contents in Human Colostrum Samples by Electrothermal Atomic Absorption Spectrophotometry. *Journal of Tropical Pediatrics* 2001;47:81–5.
7. Leotsinidis M, Alexopoulos A, Kostopoulou-Farri E. Toxic and essential trace elements in human milk from Greek lactating women: association with dietary habits and other factors. *Chemosphere* 2005;61:238–47.
8. Namihira D, Saldivar L, Pustilnik N, Carreón GJ, Salinas ME. Lead in human blood and milk from nursing women living near a smelter in Mexico City. *Journal of Toxicology and Environmental Health Taylor & Francis*; 1993;38:225–32.
9. Codex Alimentarius Commission. WORKING DOCUMENT FOR INFORMATION AND USE IN DISCUSSIONS RELATED TO CONTAMINANTS AND TOXINS IN THE GSCTFF. Japan and The Netherlands; 2023. Report No.: CF/16 INF/1.
10. World Health Organization, Food and Agriculture Organization of the United Nations, Joint FAO/WHO Expert Committee on Food Additives. Meeting (73rd : 2010 : Geneva S. Evaluation of certain food additives and contaminants: seventy-third [73rd] report of the Joint FAO/WHO Expert Committee on Food Additives. Geneva: World Health Organization; 2011 [cited 2024 Aug 12]; Available from: <https://iris.who.int/handle/10665/44515>
